# Supplementary material for: Open architecture of archaea MCM and dsDNA complexes resolved using monodispersed streptavidin affinity CryoEM
Source: PubMed Central journal article supplement (PMC11603195; doi:10.1038/s41467-024-53745-w), 2024-11-27
Supplement: 41467_2024_53745_MOESM1_ESM.pdf [file 41467_2024_53745_MOESM1_ESM.pdf]

**Supplementary Table 1.** Comparison of features from other published MCM structures. The distances were measured at the main chains of the structures.

| Source                        |                                                          | Complex              | MCM layer      | Resolution (Å)       | PDB             | Closed/open   | Spiral of hexamer | Spiral of H2I and PS1 | Center channel (CTD) | Opening gate | Nucleotide          | DNA   |      |     |     |       |
|-------------------------------|----------------------------------------------------------|----------------------|----------------|----------------------|-----------------|---------------|-------------------|-----------------------|----------------------|--------------|---------------------|-------|------|-----|-----|-------|
| Archaea                       | <i>Pyrococcus furiosus</i> NTD                           | MCM                  | Single hexamer | 3.2                  | 4POG            | Closed        | ---               | ---                   | ---                  | ---          | ---                 | ssDNA |      |     |     |       |
|                               | <i>Methanopyrus kandleri</i>                             |                      | single subunit | 1.9                  | 3F8T            | ---           | ---               | ---                   | ---                  | ---          | ---                 | ---   |      |     |     |       |
|                               | <i>Sulfolobus solfataricus</i>                           |                      | Single hexamer | 1.86                 | 6MLL            | Closed        | ---               | Right-handed 10 Å     | 20 Å                 | ---          | ADP-BeF3: 3, ADP: 3 | ssDNA |      |     |     |       |
|                               |                                                          |                      | Single subunit | 4.35                 | 3F9V            | ---           | ---               | ---                   | ---                  | ---          | ---                 | ---   |      |     |     |       |
|                               | <i>Sulfolobus solfataricus</i> NTD                       |                      | Single hexamer | 2.8                  | 2VL6            | Closed        | ---               | ---                   | ---                  | ---          | ---                 | ---   |      |     |     |       |
|                               |                                                          |                      | Dimer          | 2.0                  | 6WNZ            | ---           | ---               | ---                   | ---                  | ---          | ---                 | ---   |      |     |     |       |
| Eukaryon                      | Yeast                                                    | ORC-MCM              | Single hexamer | 4.4                  | 6RQC            | Closed        | ---               | Complex               | 20 Å                 | ---          | ---                 | dsNDA |      |     |     |       |
|                               |                                                          | ORC-Cdc6-Cdt1-MCM    |                | 3.9                  | 5V8F            | Semi-open     | No spiral         | Left-handed 10 Å      | 25 Å                 | ---          | ATPγS: 4            | dsDNA |      |     |     |       |
|                               |                                                          |                      |                | 10.0                 | 6WGI            |               |                   |                       |                      |              |                     |       |      |     |     |       |
|                               |                                                          |                      |                | MCM (phosphorylated) | 7.7             | 6WGF          | Open              | Left-handed 25-32 Å   | Left-handed 32Å      | 35 Å         | 6 Å                 | ---   | ---  |     |     |       |
|                               |                                                          |                      | 8.1            |                      | 6WGG            |               |                   |                       |                      |              |                     |       |      |     |     |       |
|                               |                                                          | MCM                  | Double hexamer | 4.77                 | 6F0L            | Closed        | ---               | ---                   | 25 Å                 | ---          | ---                 | dsDNA |      |     |     |       |
|                               |                                                          |                      |                | 3.8                  | 3JA8            |               |                   |                       |                      |              | ADP: 6              | ---   |      |     |     |       |
|                               |                                                          | MCM                  |                | 3.9                  | 5BK4            |               |                   |                       |                      |              | ADP: 4              | dsDNA |      |     |     |       |
|                               |                                                          |                      |                | 3.2                  | 7V3U            |               |                   |                       |                      |              | ATPγS: 5 ADP: 1     | ---   |      |     |     |       |
|                               |                                                          | MCM-DDK              | 3.3            | 7P5Z                 | ATP: 1 ADP: 4   |               |                   |                       |                      |              | dsDNA               |       |      |     |     |       |
|                               |                                                          |                      | 3.2            | 7PT6                 | ATPγS: 4 ADP: 2 |               |                   |                       |                      |              | ---                 |       |      |     |     |       |
|                               |                                                          |                      | 3.8            | 7PT7                 | ADP: 6          |               |                   |                       |                      |              | ---                 |       |      |     |     |       |
|                               | 2.9                                                      |                      | 7V3V           | ATPγS: 5 ADP: 1      | ---             |               |                   |                       |                      |              |                     |       |      |     |     |       |
|                               | Cdc45-MCM (NTD)-GINS                                     | Single hexamer       | 3.7            | 3JC6                 | Closed          |               |                   |                       |                      |              | ---                 | ---   | 25 Å | --- | Apo | ---   |
|                               | Cdc45-MCM-GINS                                           |                      | 4.7            | 3JC5                 |                 |               |                   |                       |                      |              |                     |       |      |     | Apo | ---   |
|                               |                                                          |                      | 4.8            | 3JC7                 |                 |               |                   |                       |                      |              |                     |       |      |     | Apo | ---   |
|                               |                                                          |                      | 4.9            | 5U8T                 |                 |               |                   |                       |                      |              |                     |       |      |     | --- | ssDNA |
|                               |                                                          |                      | 6.1            | 5U8S                 |                 | ATP: 3        | Forked DNA        |                       |                      |              |                     |       |      |     |     |       |
|                               |                                                          |                      | 3.7            | 6RAW                 |                 | ATP: 3 ADP: 3 |                   |                       |                      |              |                     |       |      |     |     |       |
|                               |                                                          |                      | 3.99           | 6RAX                 |                 | ATP: 3 ADP: 3 |                   |                       |                      |              |                     |       |      |     |     |       |
|                               |                                                          |                      | 4.28           | 6RAY                 |                 | ATP: 4 ADP: 2 | ssDNA             |                       |                      |              |                     |       |      |     |     |       |
|                               |                                                          |                      | 4.46           | 6RAZ                 |                 | ATP: 4 ADP: 2 | Forked DNA        |                       |                      |              |                     |       |      |     |     |       |
|                               | 3.9                                                      |                      | 6U0M           | ATP: 3               |                 | ssDNA         |                   |                       |                      |              |                     |       |      |     |     |       |
|                               | Cdc45-MCM-GINS-Pol ε                                     |                      | Double hexamer | 4.98                 |                 | 6HV9          | ATPγS: 2          | Forked DNA            |                      |              |                     |       |      |     |     |       |
|                               | 3.3                                                      |                      |                | 7QHS                 |                 | ATP: 4 ADP: 2 | dsDNA             |                       |                      |              |                     |       |      |     |     |       |
|                               | Cdc45-MCM-GINS-Csm3-Tof1-Ctf4                            | Single hexamer       | 3.7            | 6skl                 | Closed          | ---           | ---               | 25 Å                  | ---                  | AMPPNP: 3    | Forked DNA          |       |      |     |     |       |
|                               | Cdc45-MCM-GINS-Csm3-Tof1-Ctf4 (show only MCM N-terminal) |                      | 3.4            | 6SKO                 |                 |               |                   |                       |                      | AMPPNP: 5    |                     |       |      |     |     |       |
|                               |                                                          |                      | 3.5            | 8B9A                 |                 |               |                   |                       |                      | AMPPNP: 4    | Forked DNA          |       |      |     |     |       |
|                               |                                                          |                      | 3.5            | 8B9B                 |                 |               |                   |                       |                      |              |                     |       |      |     |     |       |
|                               | Replisome:Pol a-primase                                  |                      | 4.6            | 8B9C                 |                 |               |                   |                       |                      | AMPPNP: 3    | Forked DNA          |       |      |     |     |       |
|                               |                                                          |                      | 3.4            | 8B9D                 |                 |               |                   |                       |                      | AMPPNP: 3    |                     |       |      |     |     |       |
|                               | Human                                                    | Cdc45-MCM-GINS       | 3.29           | 6XTX                 | ATPγS: 3 ADP: 2 | Forked DNA    |                   |                       |                      |              |                     |       |      |     |     |       |
|                               |                                                          | Cdc45-MCM-GINS-AND-1 | 6.77           | 6XTY                 | ---             | ---           |                   |                       |                      |              |                     |       |      |     |     |       |
| <i>Caenorhabditis elegans</i> | DNSN-1_CMG_TIM-1_TIPN-1                                  | 3.75                 | 8OUW           | ---                  | ---             | ---           | ---               | ---                   | AMPPNP: 4            | Forked DNA   |                     |       |      |     |     |       |

**Supplementary Table 2.** CryoEM analysis for MCM particle distribution on mspSA affinity grids.

| <b>Screening of samples<br/>on SA grids</b>     | <b>MCM-apo</b>             |            | <b>MCM-ATP-dsDNA</b>            |            |
|-------------------------------------------------|----------------------------|------------|---------------------------------|------------|
|                                                 | 0.05 mg/ml<br>biotinylated | 0.05 mg/ml | 0.07 mg/ml<br>biotin-tagged DNA | 0.07 mg/ml |
| <i>Microscope</i>                               | Glacios                    | Glacios    | Glacios                         | Glacios    |
| <i>Voltage (keV)</i>                            | 200                        | 200        | 200                             | 200        |
| <i>Detector</i>                                 | Falcon3                    | Falcon3    | Falcon3                         | Falcon3    |
| <i>Å/pixel</i>                                  | 2.0                        | 2.0        | 2.0                             | 2.0        |
| <i>Defocus range (µm)</i>                       | -3 to -6                   | -4 to -7   | -2 to -8                        | -3 to -6   |
| <i>Total Dose<br/>(electrons/Å<sup>2</sup>)</i> | 50                         | 50         | 50                              | 50         |
| <i>Number of images<br/>from random squares</i> | 12                         | 13         | 21                              | 31         |
| <i>Number of particles</i>                      | 4,154                      | 98         | 5,407                           | 699        |

**Supplementary Table 3.** CryoEM data collection, refinement and validation statistics

| Samples                                          | MCM-apo                 | MCM-ATP-dsDNA                |
|--------------------------------------------------|-------------------------|------------------------------|
|                                                  | 0.08 mg/ml biotinylated | 0.07 mg/ml biotin-tagged DNA |
| <b>Data collection and processing</b>            |                         |                              |
| Voltage (kV)                                     | 300                     | 300                          |
| Detector                                         | Gatan K3                | Falcon 4                     |
| Energy filter                                    | bioquantum              | Selectris X                  |
|                                                  | 20 eV slit              | 20 eV slit                   |
| Electron exposure (e/Å <sup>2</sup> )            | 40                      | 39                           |
| Defocus range (μm)                               | -0.5 to -3.0            | -0.5 to -3.0                 |
| Pixel size (Å)                                   | 1.072                   | 0.932                        |
| Symmetry imposed                                 | C1                      | C1                           |
| Number of frames                                 | 40                      | 40                           |
| Number of images                                 | 4,003                   | 14,584                       |
| Final particle images                            | 445K                    | 127K                         |
| Map resolution (Å)                               | 3.26                    | 3.57                         |
| FSC threshold                                    | 0.143                   | 0.143                        |
| Local resolution (4 middle subunits)             | 2.5-3.0                 | 3.0-3.5                      |
| <b>Refinement</b>                                |                         |                              |
| Initial model used                               | AlphaFold2 predicted    | AlphaFold2 predicted         |
| Model resolution (Å)                             | 3.37                    | 3.57                         |
| FSC threshold                                    | 0.5                     | 0.5                          |
| Map sharpening <i>B</i> factor (Å <sup>2</sup> ) | 111.5                   | 109.4                        |
| Model composition                                |                         |                              |
| Non-hydrogen atoms                               | 26842                   | 26522                        |
| Protein residues                                 | 3753                    | 3840                         |
| Ligands                                          |                         | ATP: 2, ADP: 3, MG: 3        |
| <i>B</i> factors (Å <sup>2</sup> )               |                         |                              |
| Protein                                          | 47.92                   | 104.29                       |
| Ligand                                           |                         | 43.24                        |
| R.m.s. deviations                                |                         |                              |
| Bond lengths (Å)                                 | 0.006                   | 0.002                        |
| Bond angles (°)                                  | 0.718                   | 0.538                        |
| Validation                                       |                         |                              |
| MolProbity score                                 | 1.45                    | 1.63                         |
| Clashscore                                       | 4.89                    | 9.75                         |
| Poor rotamers (%)                                | 0.41                    | 0.37                         |
| Ramachandran plot                                |                         |                              |
| Favored (%)                                      | 96.81                   | 97.37                        |
| Allowed (%)                                      | 3.19                    | 2.52                         |
| Disallowed (%)                                   | 0.00                    | 0.11                         |
| Accession codes                                  |                         |                              |
|                                                  | EMD-38109               | EMD-38111                    |
|                                                  | PDB 8X7T                | PDB 8X7U                     |

**Supplementary Table 4.** CryoEM data collection, refinement and validation statistics

| Samples                                          | ScPoI II EC              | CA                       |
|--------------------------------------------------|--------------------------|--------------------------|
|                                                  | 0.1 mg/ml biotinylated   | 0.07 mg/ml biotinylated  |
| <b>Data collection and processing</b>            |                          |                          |
| Voltage (kV)                                     | 300                      | 300                      |
| Detector                                         | Gatan K3                 | Gatan K3                 |
| Energy filter                                    | bioquantum<br>20 eV slit | bioquantum<br>20 eV slit |
| Electron exposure (e/Å <sup>2</sup> )            | 50                       | 50                       |
| Defocus range (µm)                               | -1.0 to -2.4             | -1.0 to -2.4             |
| Pixel size (Å)                                   | 0.829                    | 0.829                    |
| Symmetry imposed                                 | C1                       | D6                       |
| Number of frames                                 | 50                       | 50                       |
| Number of images                                 | 1,500                    | 11,129                   |
| Final particle images                            | 146,186                  | 117,411                  |
| Map resolution (Å)                               | 2.98                     | 3.14                     |
| FSC threshold                                    | 0.143                    | 0.143                    |
| Local resolution                                 | 3.0-5.0                  | 3.0-4.2                  |
| <b>Refinement</b>                                |                          |                          |
| Initial model used                               | 8TVY                     | 8TY6                     |
| Model resolution (Å)                             | 3.29                     | 3.31                     |
| FSC threshold                                    | 0.5                      | 0.5                      |
| Map sharpening <i>B</i> factor (Å <sup>2</sup> ) | 72.7                     | 137.9                    |
| Model composition                                |                          |                          |
| Non-hydrogen atoms                               | 27832                    | 19716                    |
| Protein residues                                 | 3392                     | 2628                     |
| Ligands                                          | 8                        |                          |
| Nucleotides                                      | 45                       |                          |
| <i>B</i> factors (Å <sup>2</sup> )               |                          |                          |
| Protein                                          | 79.97                    | 57.04                    |
| Ligand                                           | 63.90                    |                          |
| Nucleotides                                      | 106.93                   |                          |
| R.m.s. deviations                                |                          |                          |
| Bond lengths (Å)                                 | 0.004                    | 0.004                    |
| Bond angles (°)                                  | 0.950                    | 0.993                    |
| Validation                                       |                          |                          |
| MolProbity score                                 | 1.83                     | 1.62                     |
| Clashscore                                       | 9.74                     | 8.89                     |
| Poor rotamers (%)                                | 0.07                     | 0.00                     |
| Ramachandran plot                                |                          |                          |
| Favored (%)                                      | 95.45                    | 97.24                    |
| Allowed (%)                                      | 4.52                     | 2.76                     |
| Disallowed (%)                                   | 0.03                     | 0.00                     |
| Accession codes                                  | EMD-61287<br>PDB 9JA1    | EMD-61286<br>PDB 9JA0    |

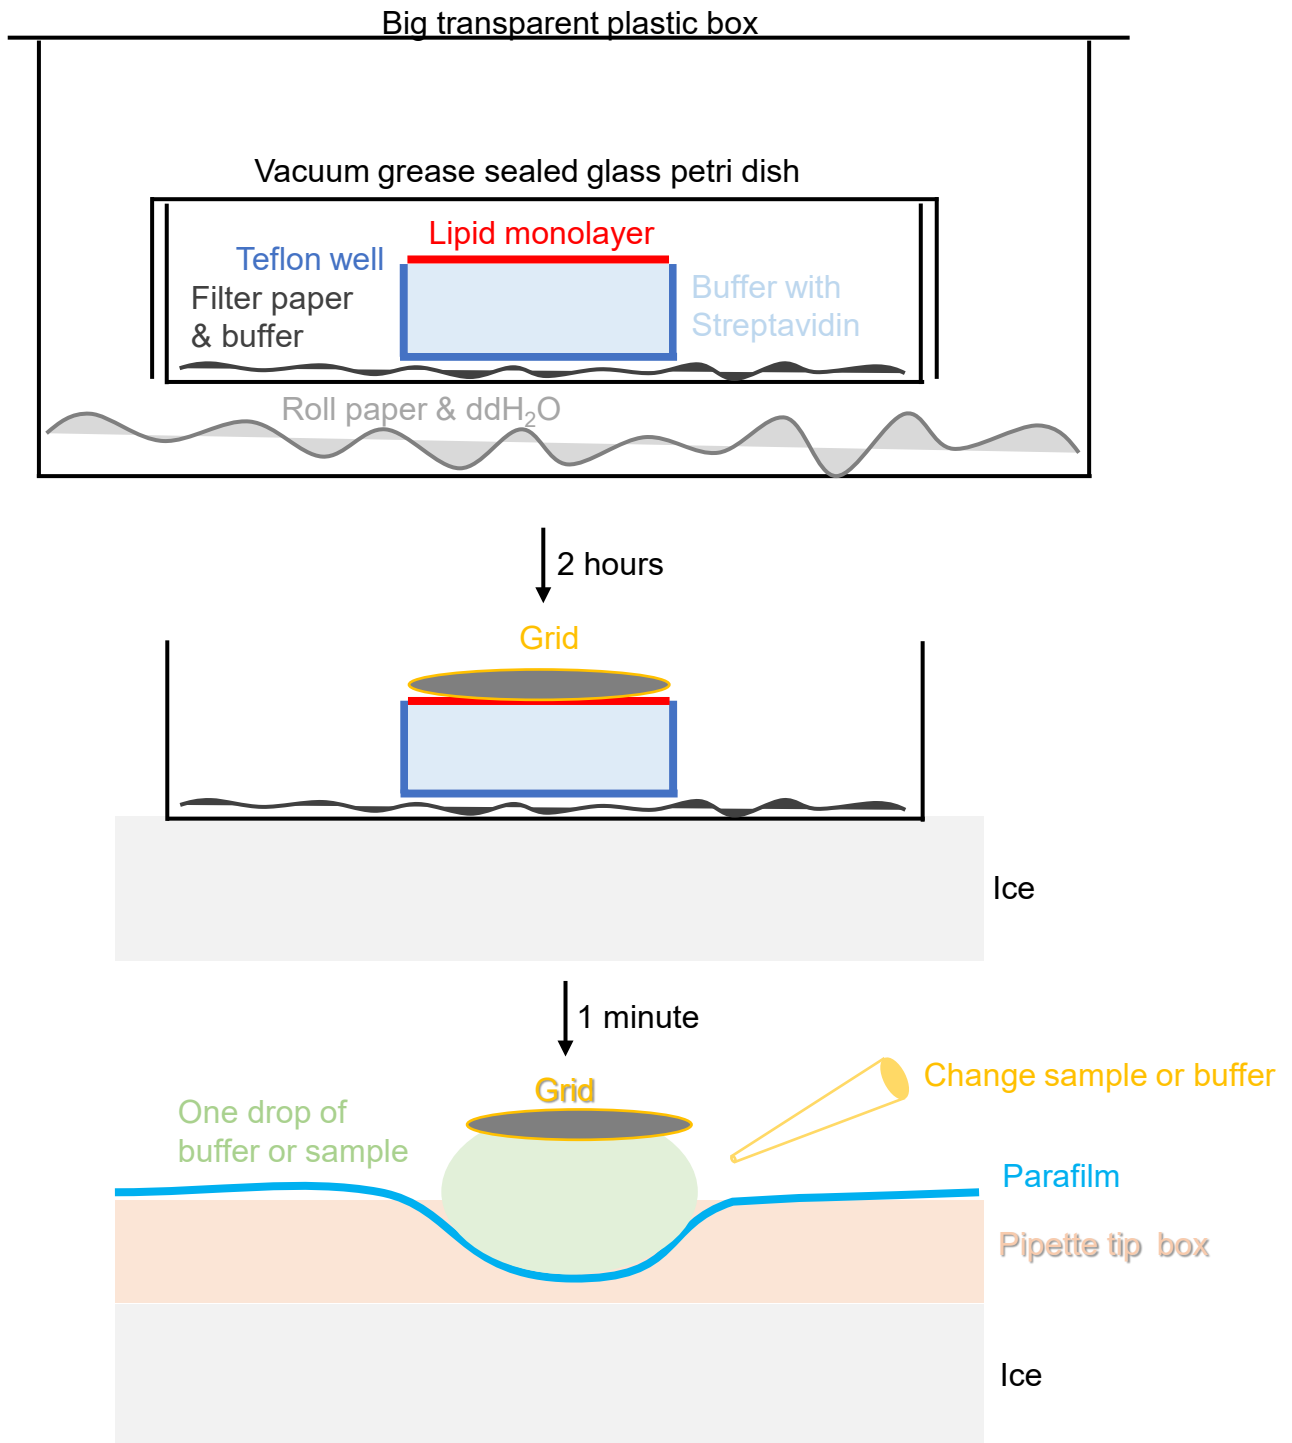

**Supplementary Figure 1 | Key steps of preparing SA affinity grid.** SA is incubated under the lipid monolayer for 2 hours. The grid (carbon side facing downward) is float on the sample droplet and buffer change needs to be gentle.

15% Biotin-Lipid, 0.08 mg/ml SA    15% Biotin-Lipid, 0.15 mg/ml SA    15% Biotin-Lipid, 0.24 mg/ml SA

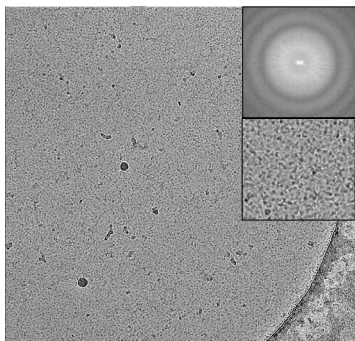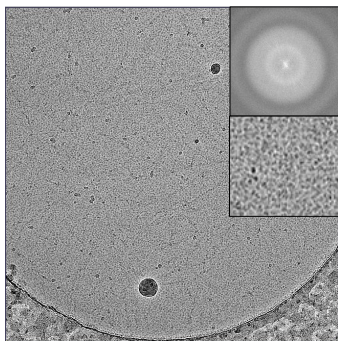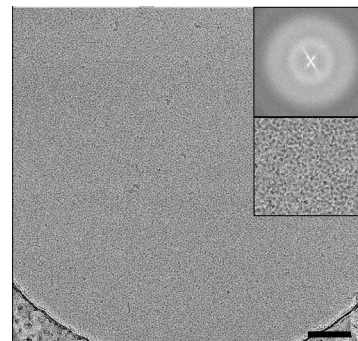

25% Biotin-Lipid, 0.24 mg/ml SA    25% Biotin-Lipid, 0.15 mg/ml SA    35% Biotin-Lipid, 0.15 mg/ml SA

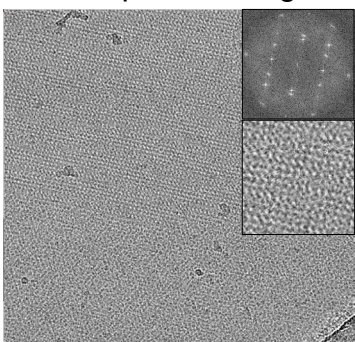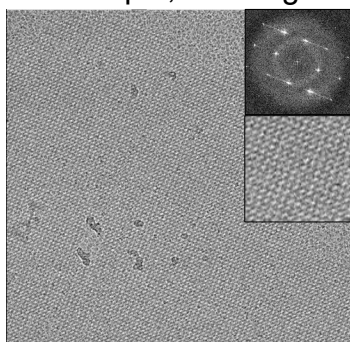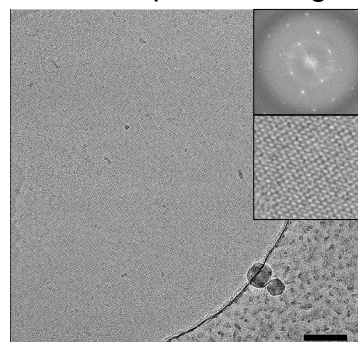

35% Biotin-Lipid, 0.08 mg/ml SA

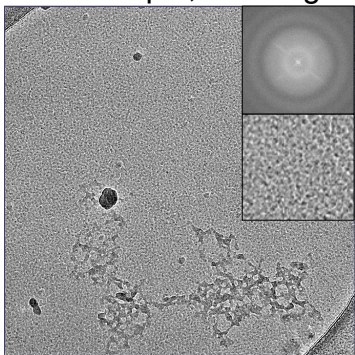

**Supplementary Figure 2 | Formation of monodispersed single particle and 2D crystalline SA at the indicated conditions.** Shown are representative cryoEM micrographs. Insets show the Fourier transform of the image and an enlarged view. Images are on the same scale. Scale bars, 100 nm. The experiment was repeated at least three times independently with similar results.

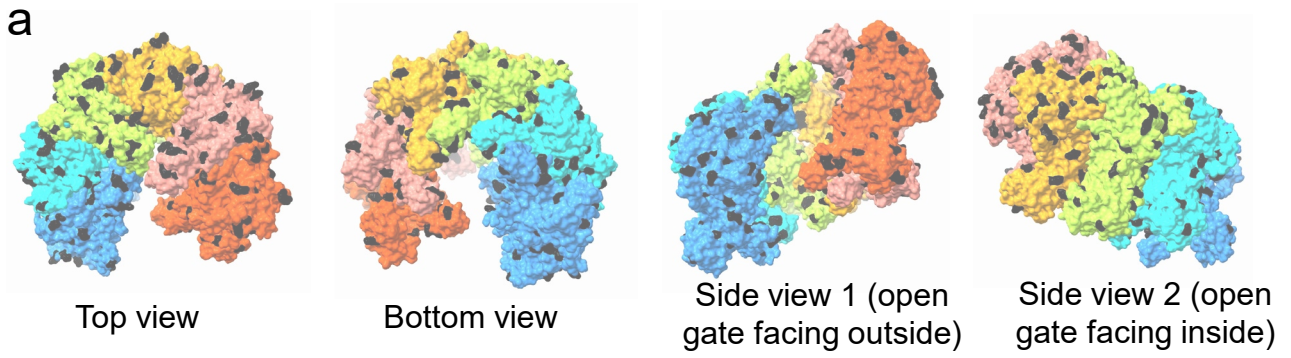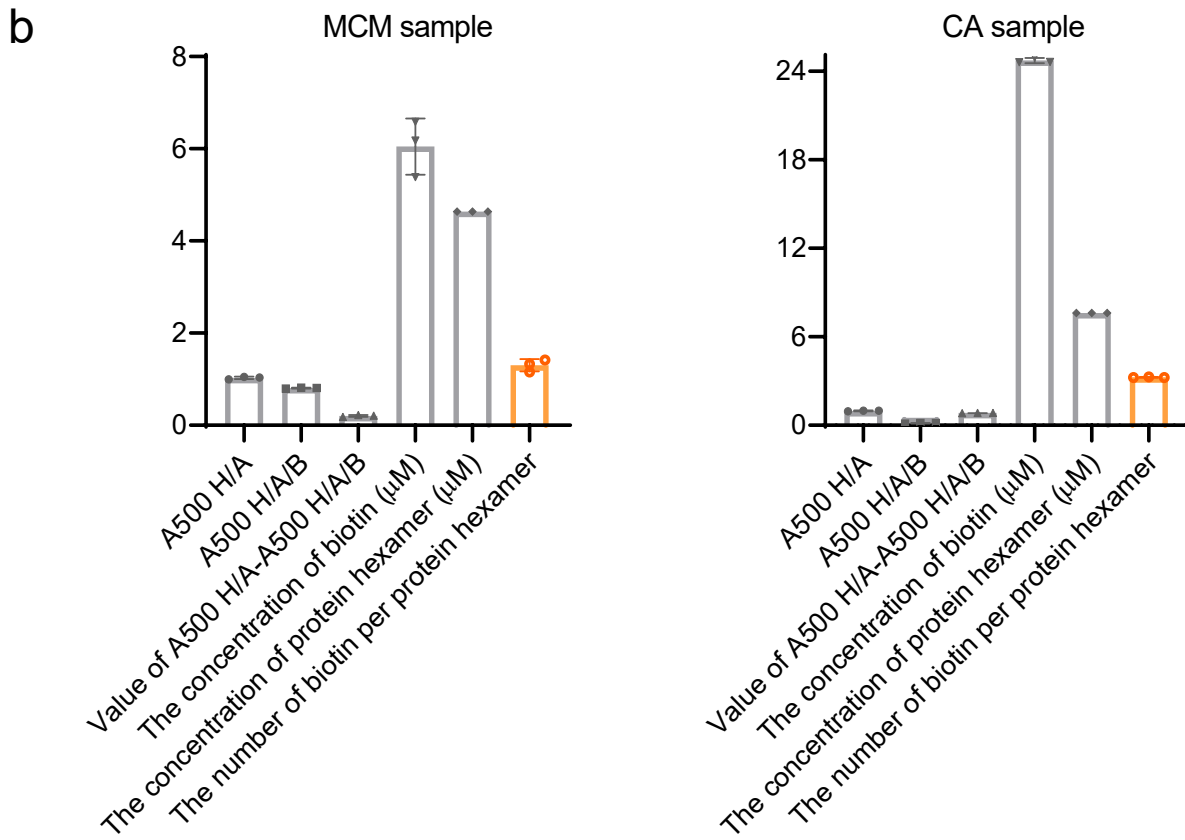

**Supplementary Figure 3 | Biotinylation of protein surface lysine residues.** (a) The exposed lysine residues in the structure of MCM. The lysine residuals are colored in black. (b) The extend of biotinylation for the MCM (left) and HIV-1 CA hexamer.



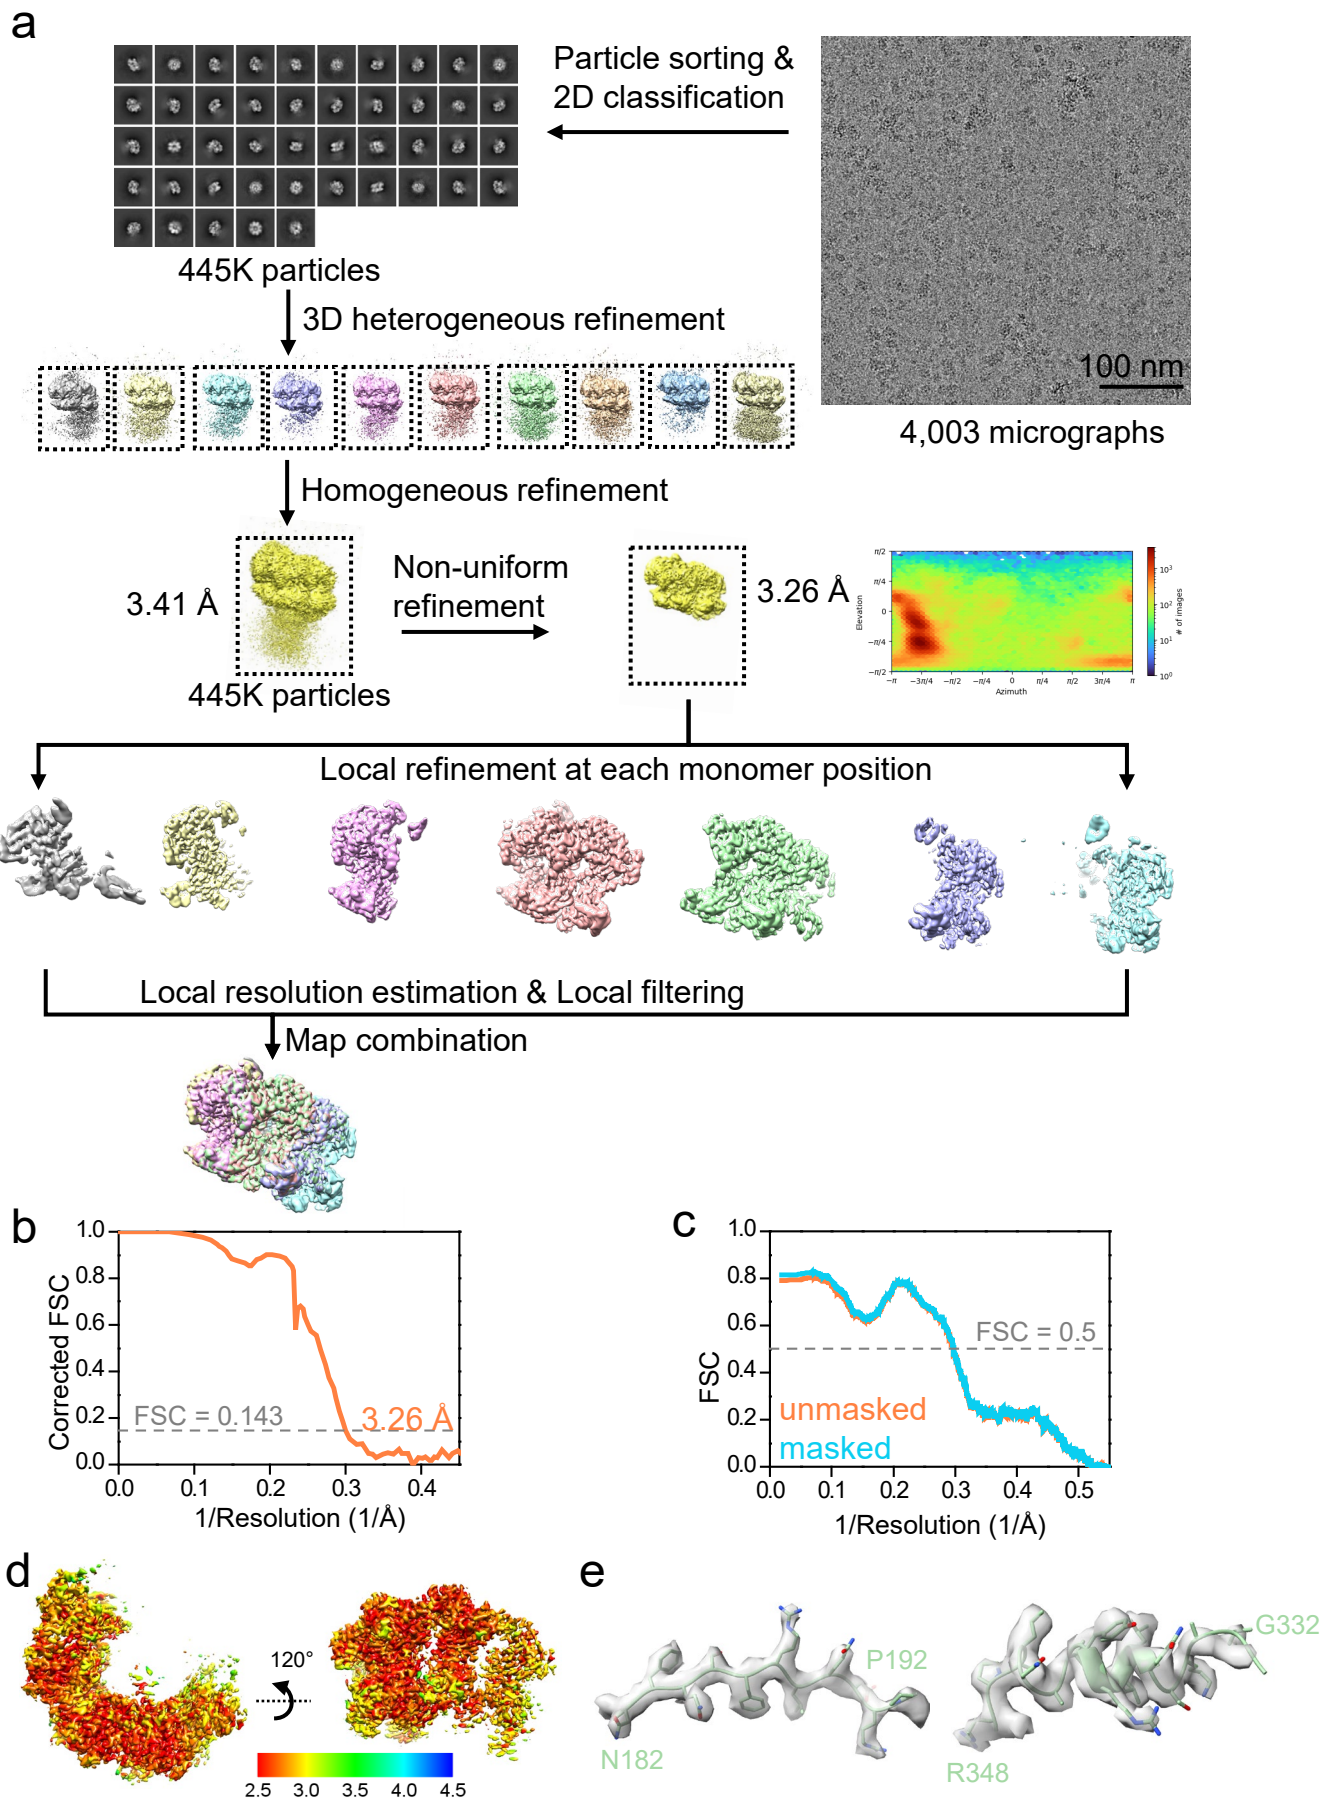

**Supplementary Figure 4 | Data processing summary of MCM-apo captured by mspSA affinity grids. (a)** Workflow of MCM-apo structure determination. **(b)** Corrected FSC and local resolution of the density map of MCM-apo. **(c)** Map-to-model FSC curves from Phenix. **(d-e)** Local resolution map from a central section **(d)** and representative filtered density map from CryoSPARC overlapped with the refined atomic model **(e)**.



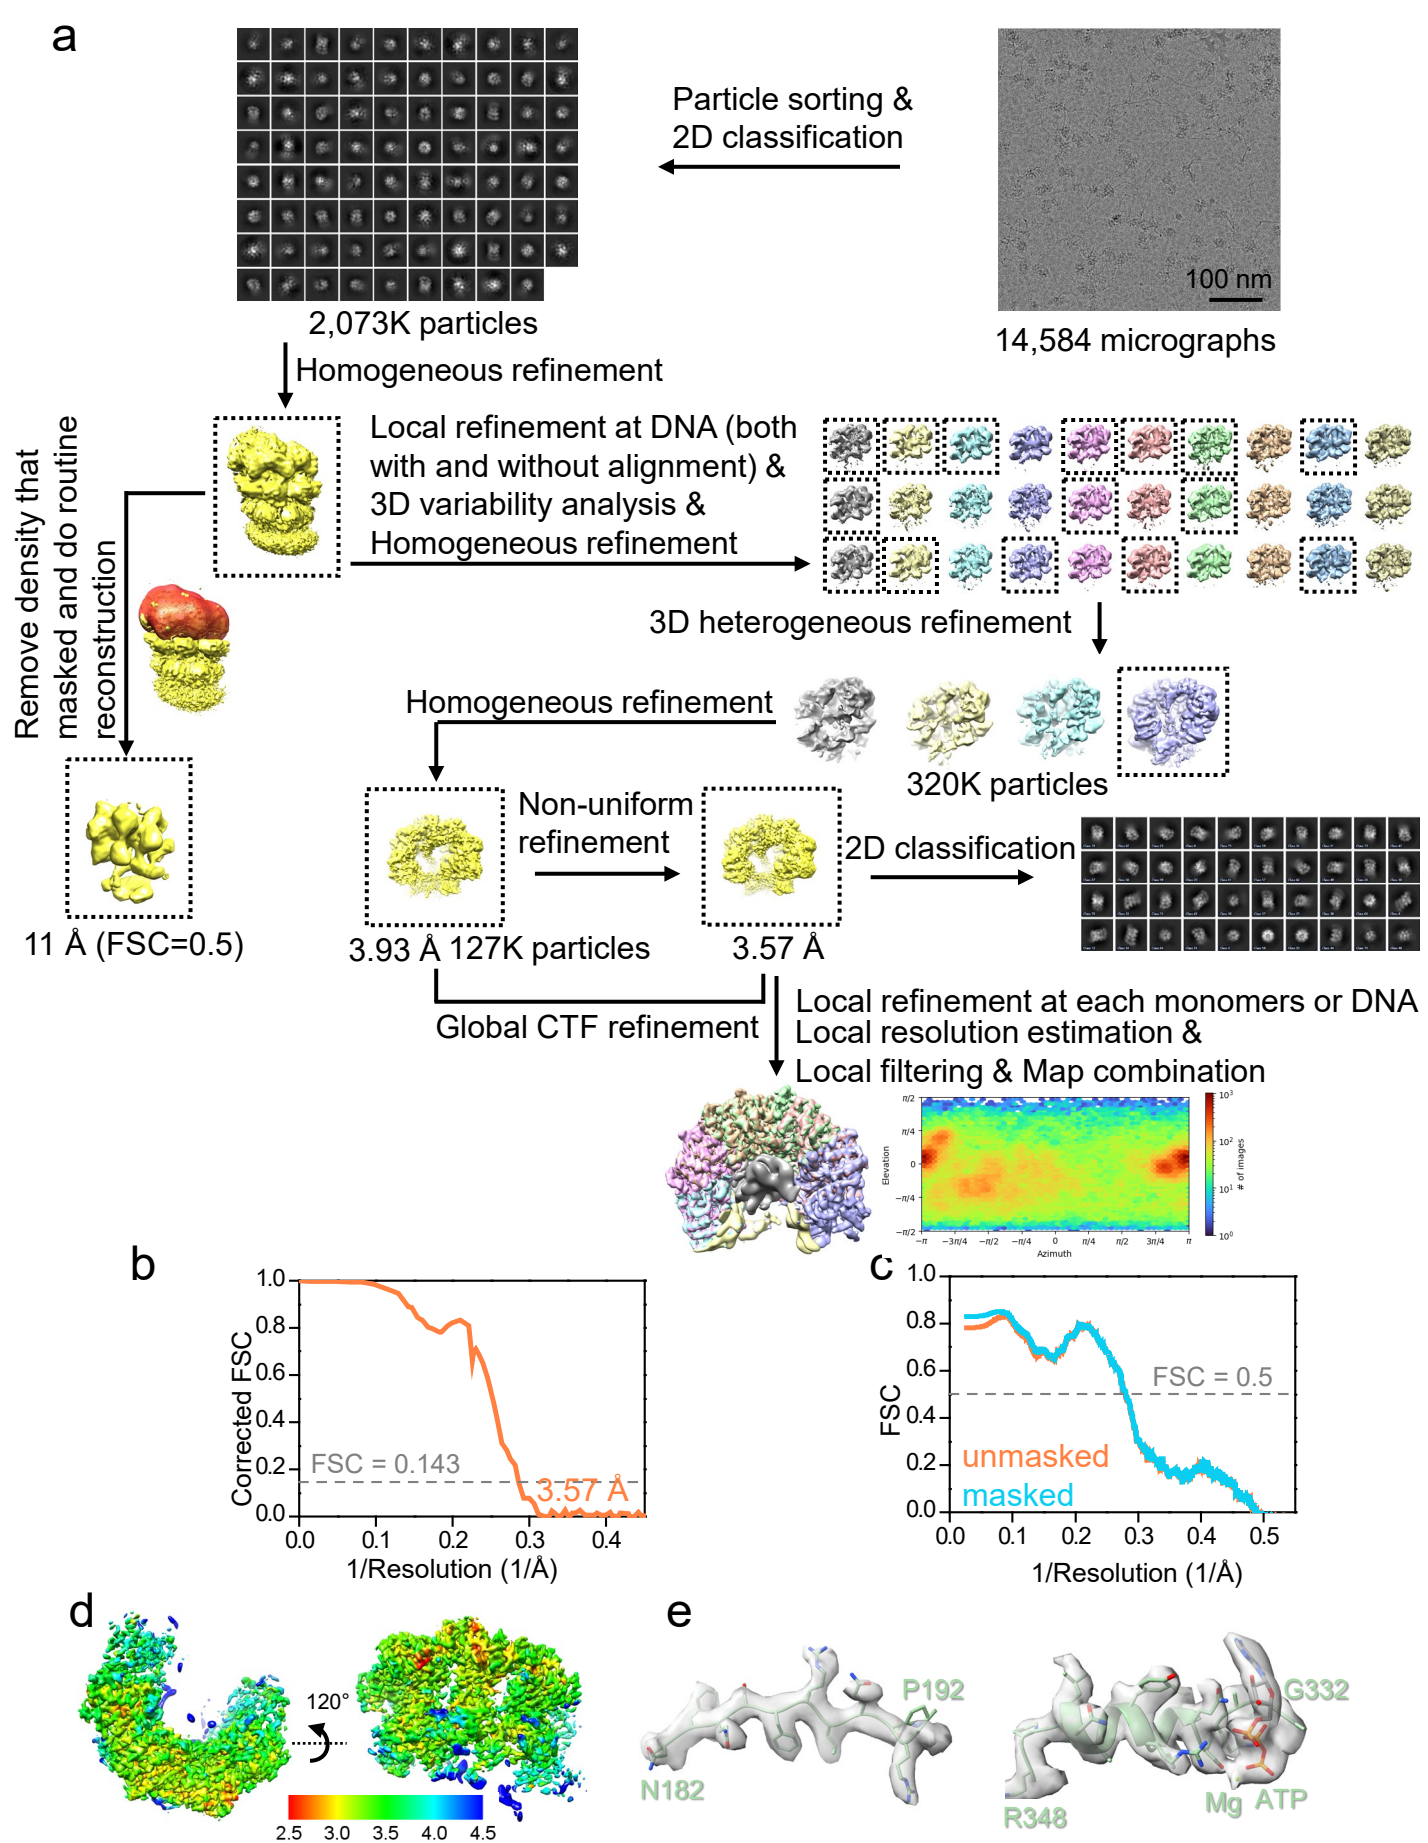

**Supplementary Figure 5 | Data processing summary of MCM-ATP-dsDNA captured by *mspSA* affinity grids. (a) Workflow of MCM-ATP-dsDNA structure determination. (b) Corrected FSC and local resolution of the density map of MCM-ATP-dsDNA. (c) Map-to-model FSC curves from Phenix. (d-e) Local resolution map from a central section (d) and representative filtered density map from CryoSPARC overlapped with the refined atomic model (e).**

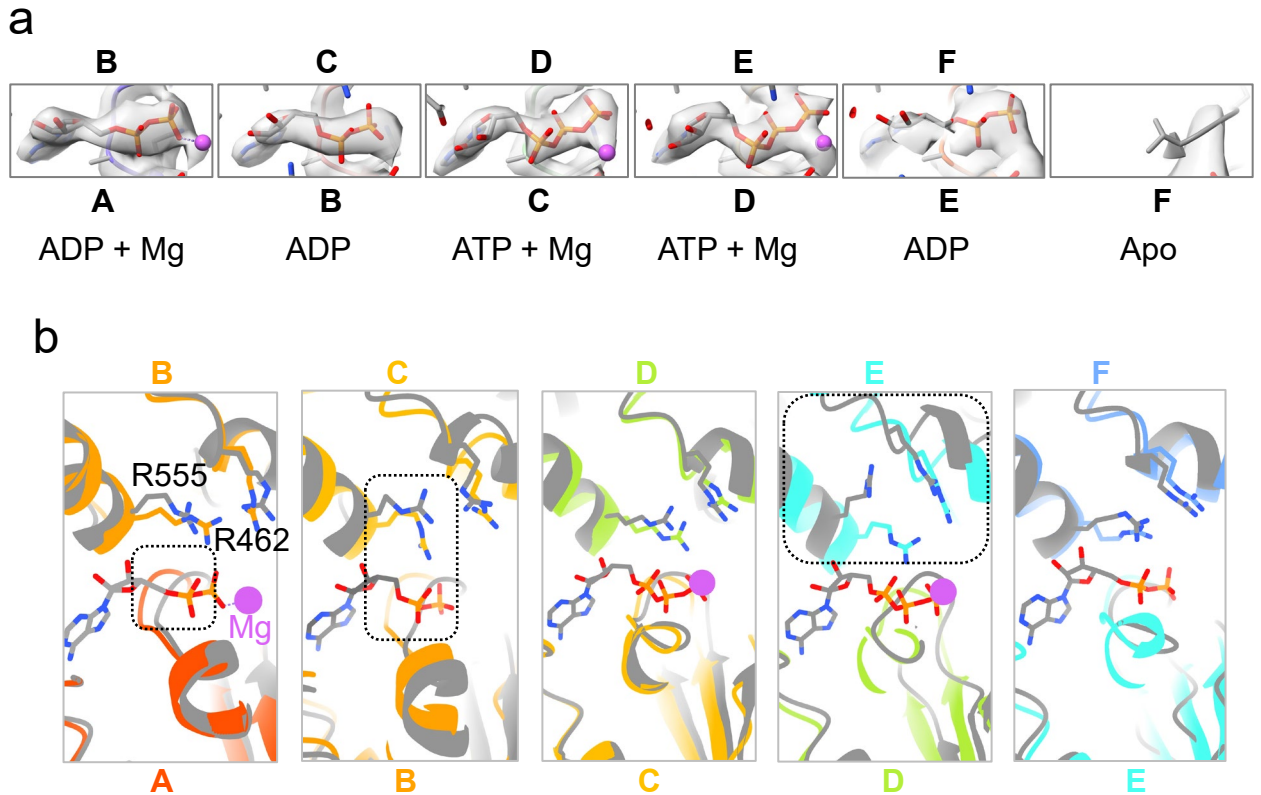

**Supplementary Figure 6 | Structures of the ATP pocket in MCM-ATP-dsDNA complex. (a)** Model building of ATP/ADP at the *cis* interfaces of ATP pocket. The ATP/ADP and most side chains are clearly resolved in A-E subunits, but poorly defined in F subunit. The Mg ions (purple) are visualized in A-B, C-D and D-E pockets. **(b)** Comparison of the ATP pockets between MCM-apo (grey) and MCM-ATP-dsDNA (colored). The structures were aligned on the segments 333-350 and 475-490, which are around the ATP pockets. Mg ions are shown in purple.

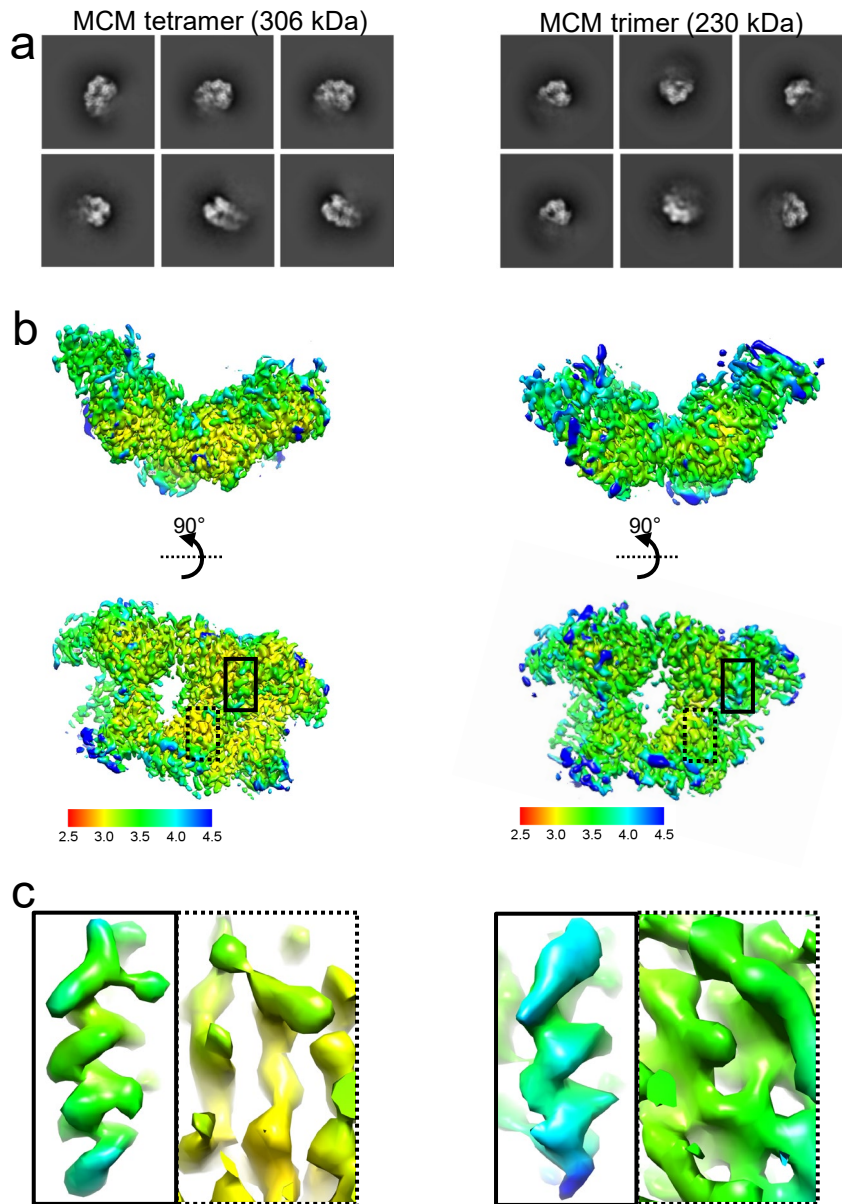

**Supplementary Figure 7 | Reconstruction of subcomplexes of MCM-apo captured by mspSA affinity grids. (a)** 2D averages of the subtracted tetramer (left) and trimer (right) MCM subcomplexes. **(b)** The overall 3D map of the subcomplexes colored according to local resolution. **(c)** Alpha helix and beta strands from each subcomplexes are shown, colored according to local resolution.



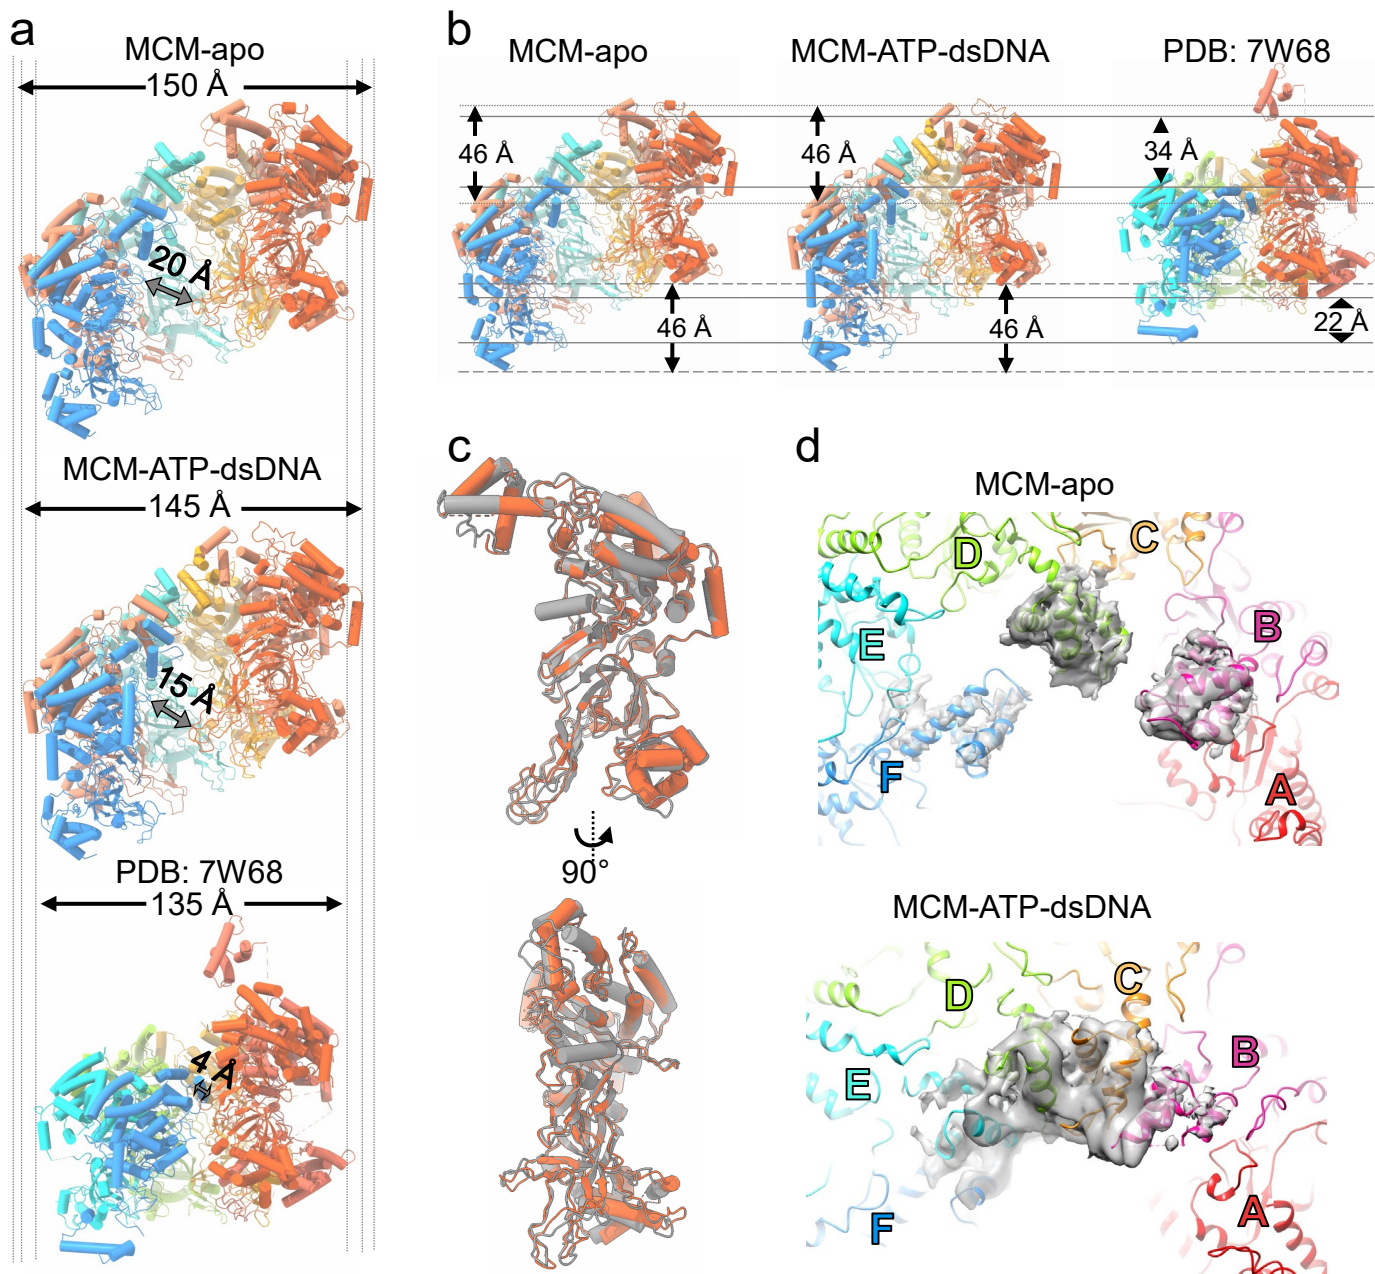

**Supplementary Figure 8 | Structure comparison of MCM at open conformations.** MCM-apo, MCM-ATP-dsDNA and previously reported open conformation at highest resolution 4.4 Å (PDB: 7W68) are included. **(a)** Comparison of the size of the hexamer ring and the gate among the three open MCM structures. **(b)** Comparison of the spiral rise among the three open MCM structures. **(c)** Overlay of the B subunits from MCM-apo (grey) and MCM-ATP-dsDNA (orange). The RMSD is 0.98 Å. **(d)** Comparison of the WH (grey density) between MCM-apo and MCM-ATP-dsDNA.

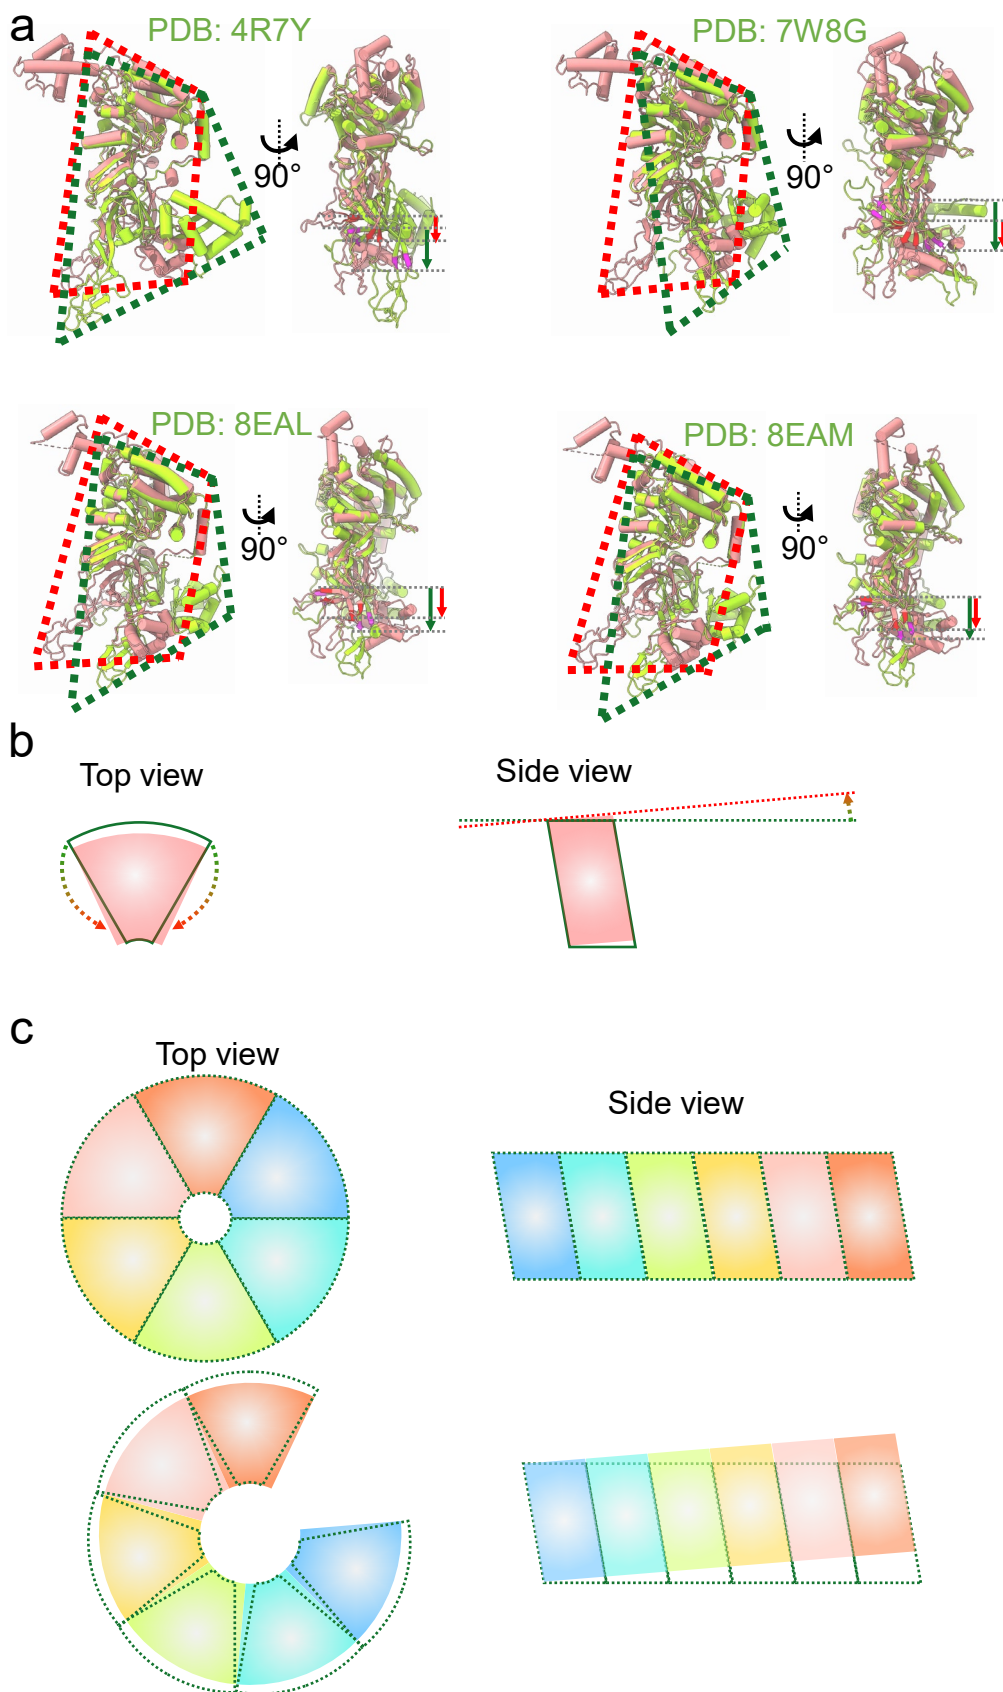

**Supplementary Figure 9 | Handedness analysis of the MCM. (a)** The B subunit of MCM-apo (pink) superimposed with the B subunit of other published MCM structures (green) aligned on CTD. The dashed lines are the outlines of the B subunits of MCM-apo structure (red) and of previous reported structures (green). Arrows indicate the height differences of NT and ZF in a single subunit. **(b)** A simplified shape representation of MCM B subunit, in top and side views. **(c)** A simplified shape model of MCM hexamer in the close conformation (top, from previous structures) and in the open conformation (bottom, this study), shown in top (left) and side (right) views. The side views are viewed from the center channel. The handedness and the size of central channel are clearly illustrated with the model.

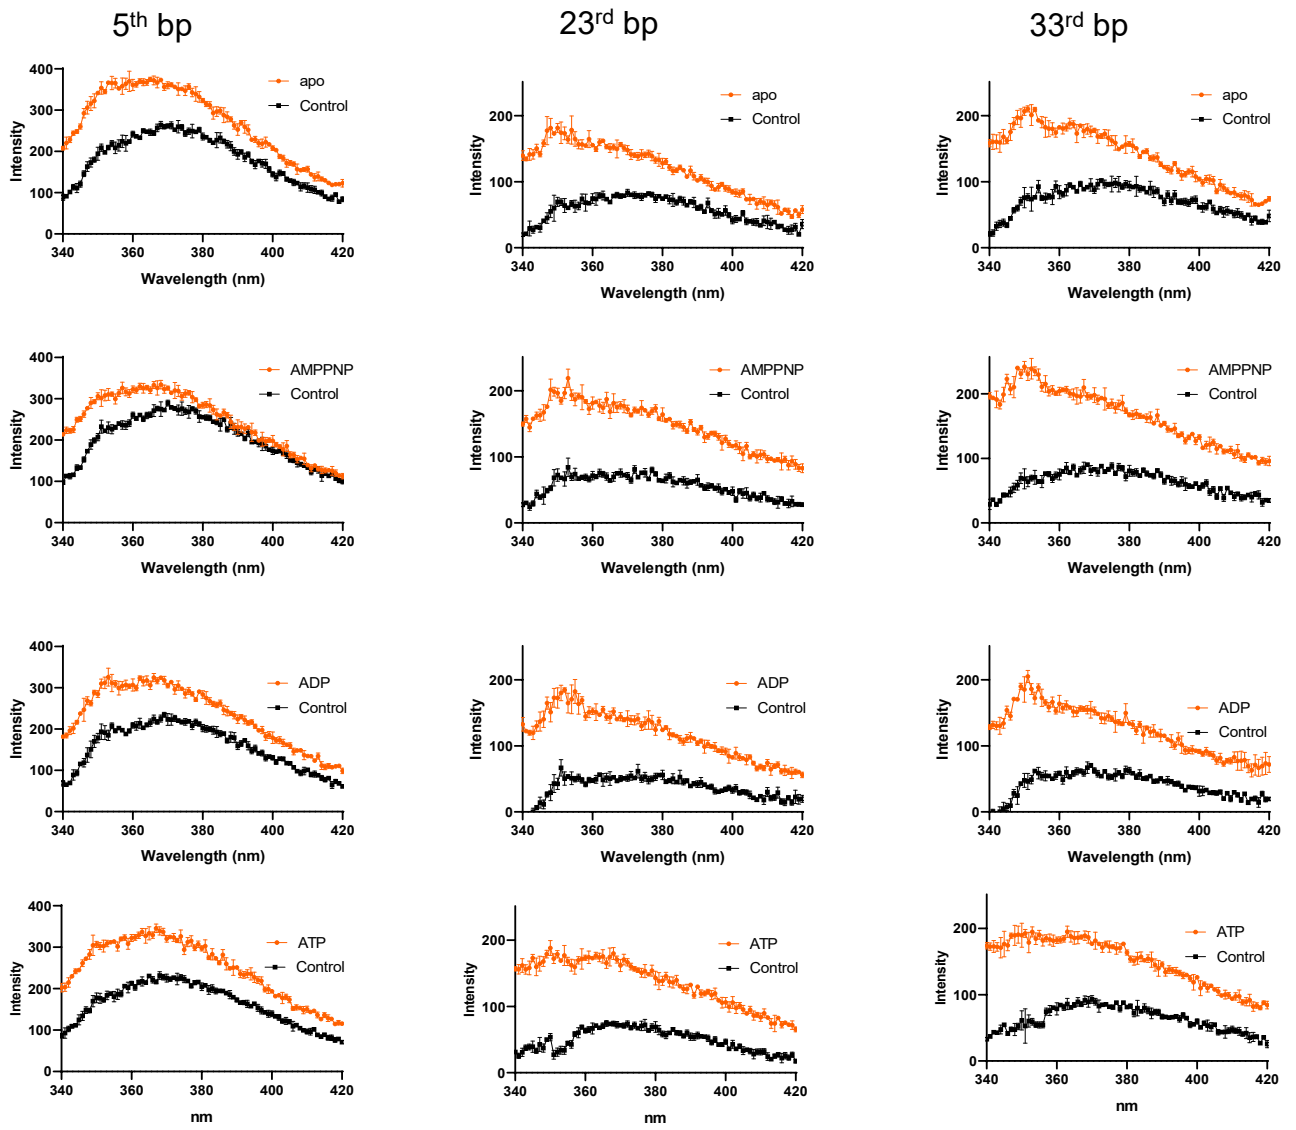

**Supplementary Figure 10 | Emission spectrums of the 2-AP labeled DNA.** The error bars are the standard deviation of the measurements (N=3).



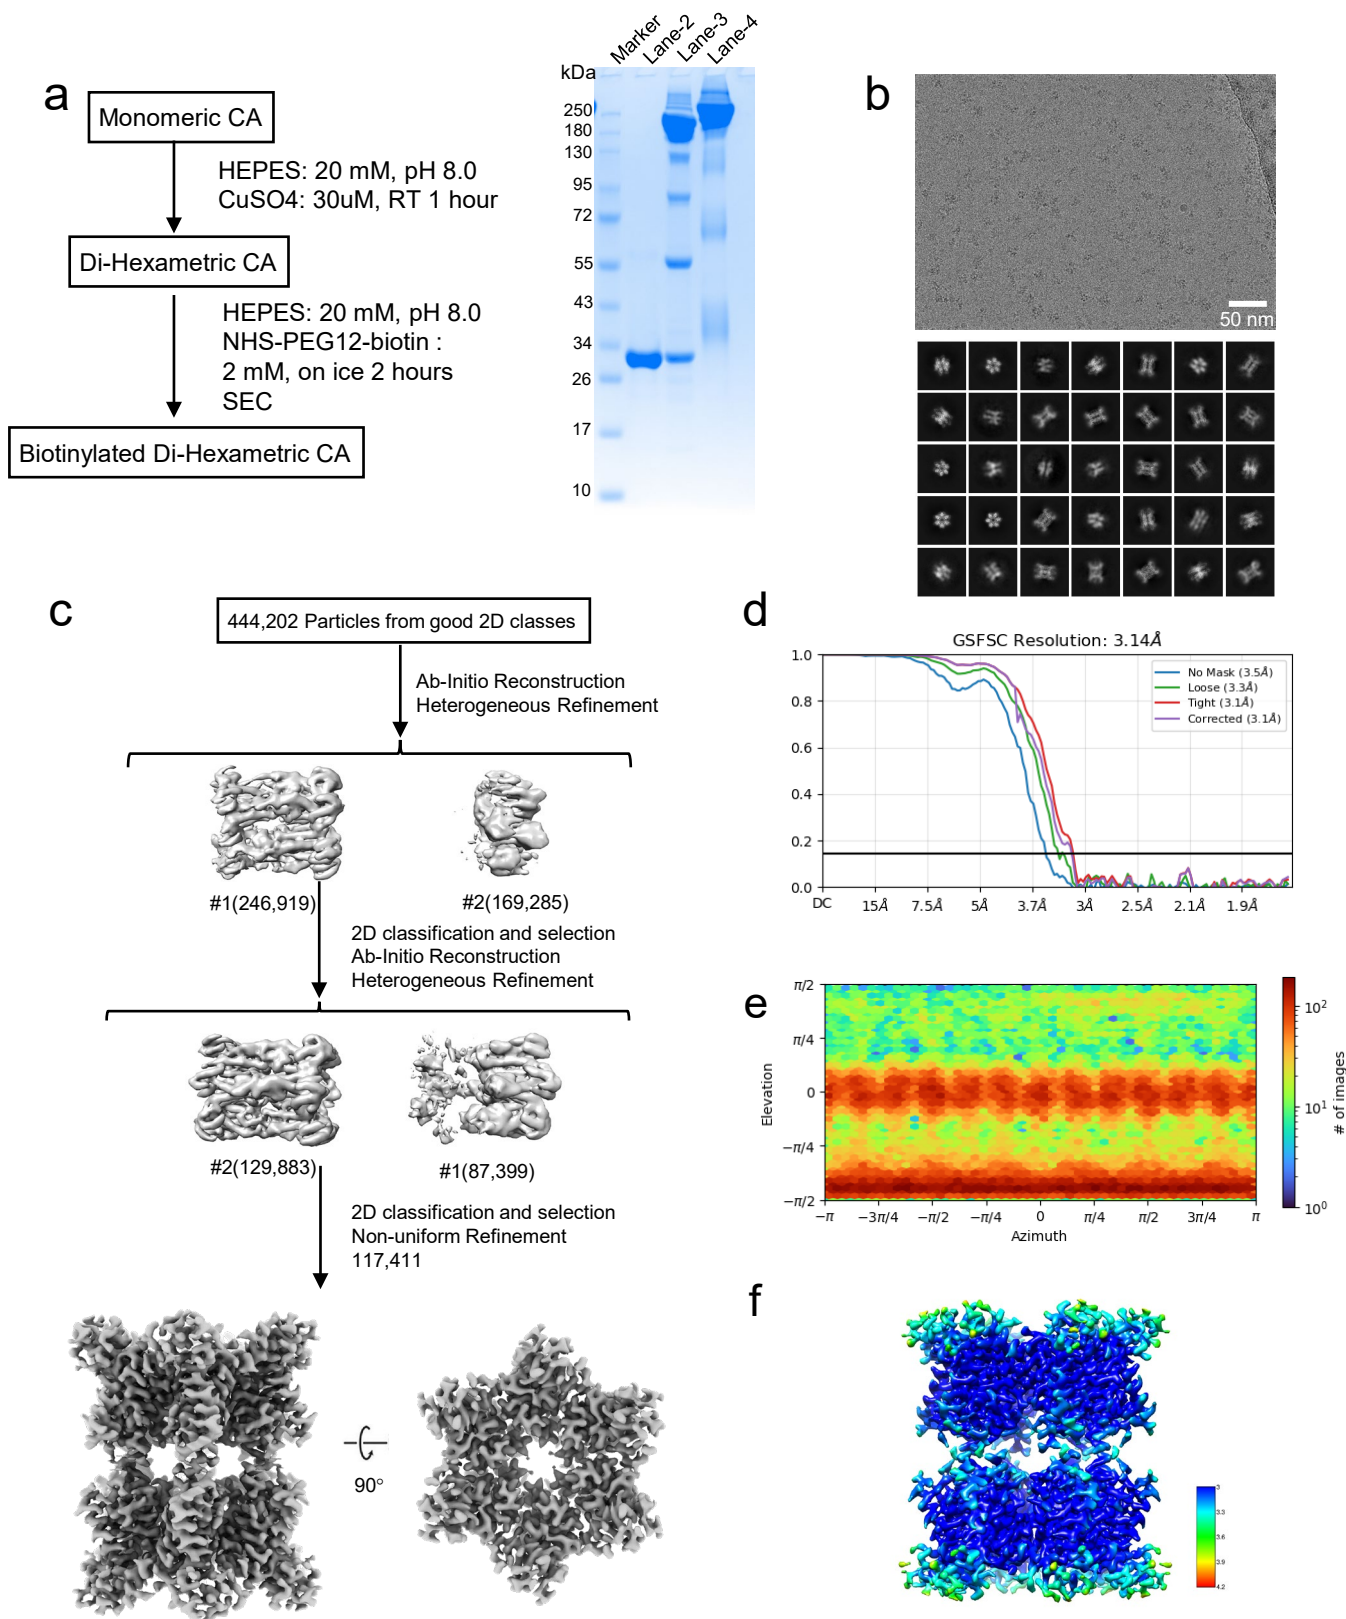

**Supplementary Figure 11 | Data processing summary of HIV CA Di-hexamer captured by mspSA affinity grids. (a)** HIV CA Di-hexamer protein generation and SDS-PAGE analysis of monomeric CA, CuSO<sub>4</sub> digested CA and biotinylated Di-hexamer after SEC in lane-2, lane-3 and lane-4 respectively. **(b)** Representative raw micrograph (top) and gallery of reference-free 2D class averages (bottom) of CA Di-hexamer. **(c)** Workflow of CA Di-hexamer structure determination. **(d-f)** Corrected FSC **(d)**, orientational distribution heat map **(e)** and local resolution **(f)** of the density map of CA Di-hexamer.

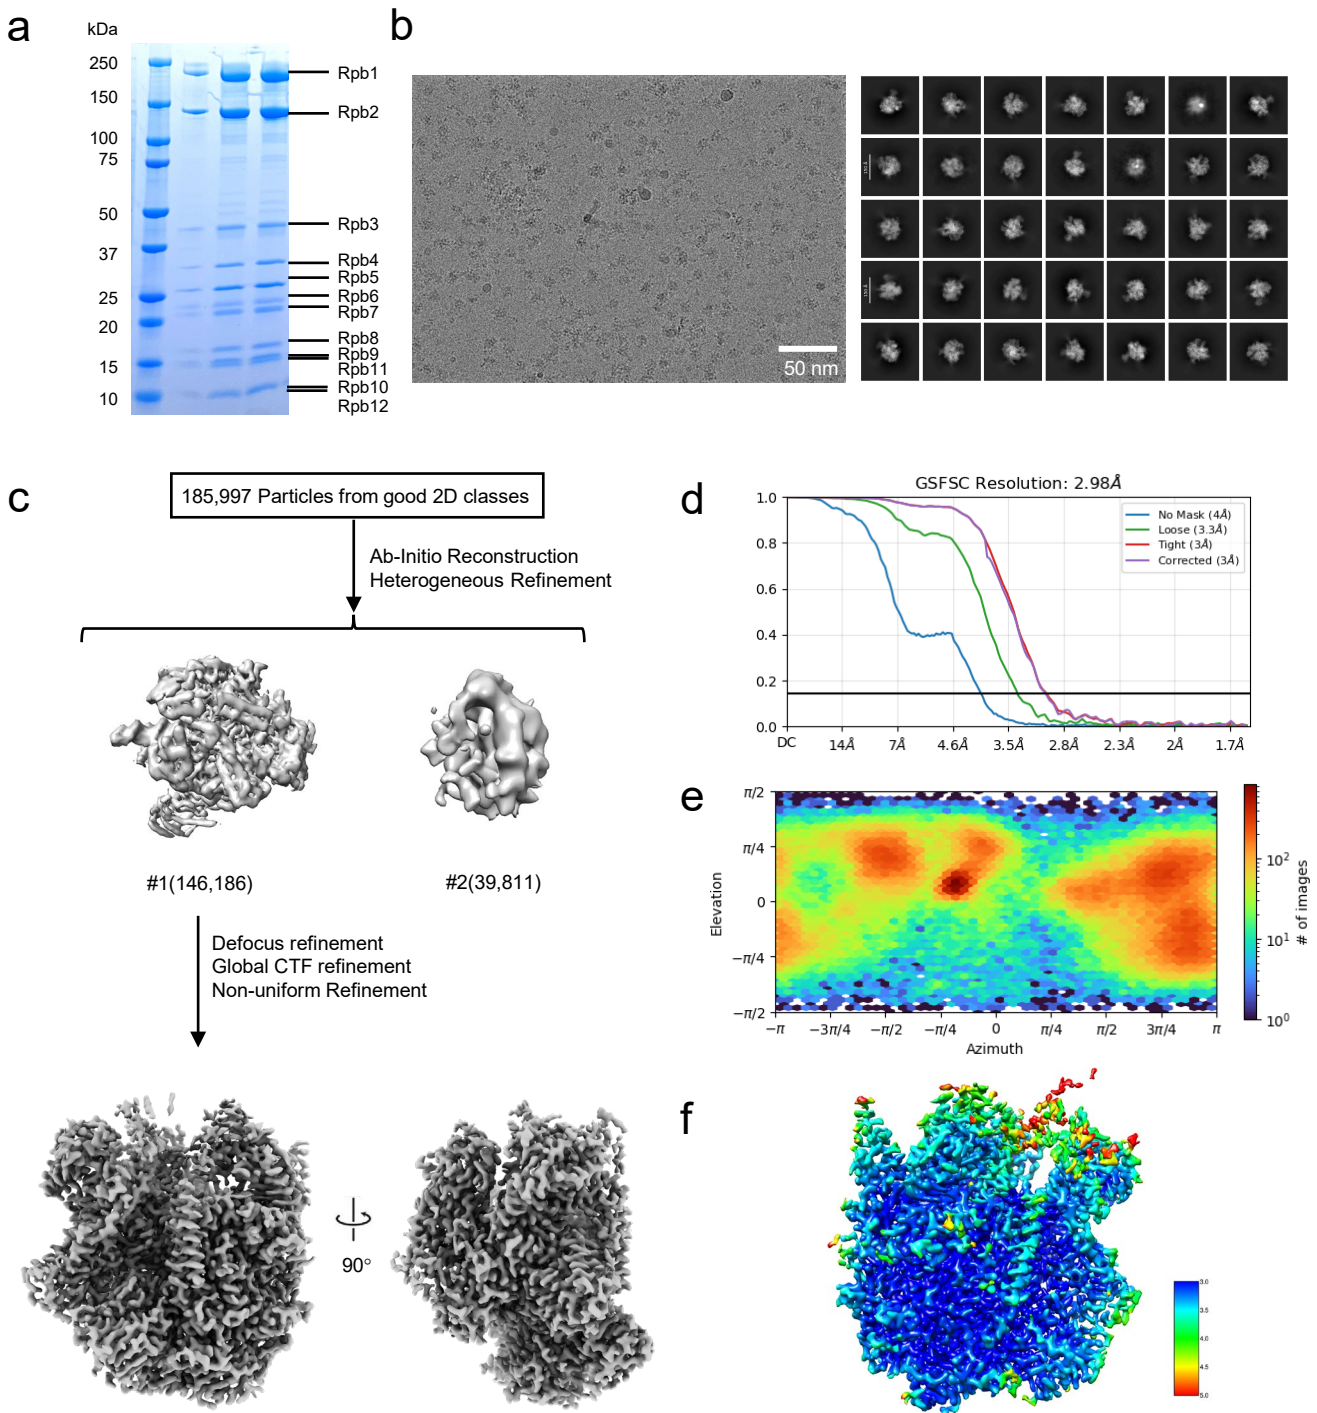

**Supplementary Figure 12 | Data processing summary of scPoll EC complex captured by mspSA affinity grids. (a)** SDS-PAGE analysis of scPoll EC complex after SEC. **(b)** Representative raw micrograph (top) and gallery of reference-free 2D class averages (bottom) of scPoll EC complex. **(c)** Workflow of scPoll EC complex structure determination. **(d-f)** Corrected FSC **(d)**, orientational distribution heat map **(e)** and local resolution **(f)** of the density map of scPoll EC complex.

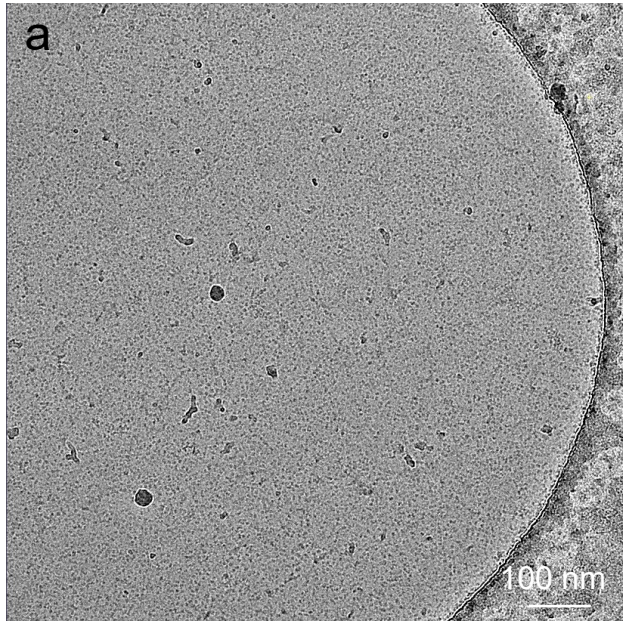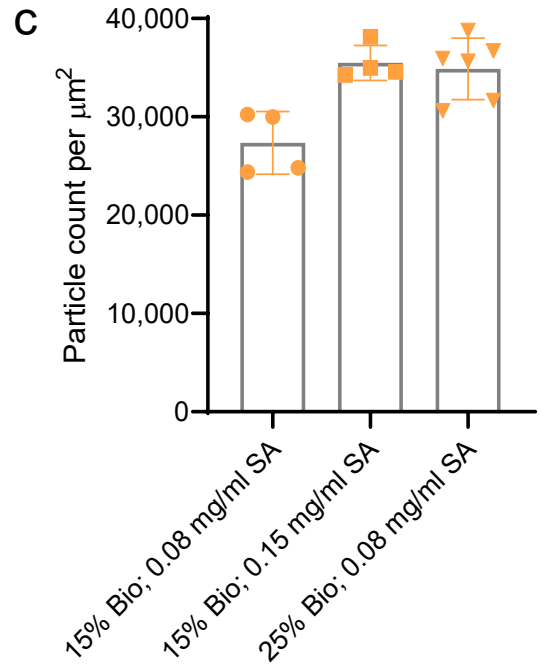

**b**

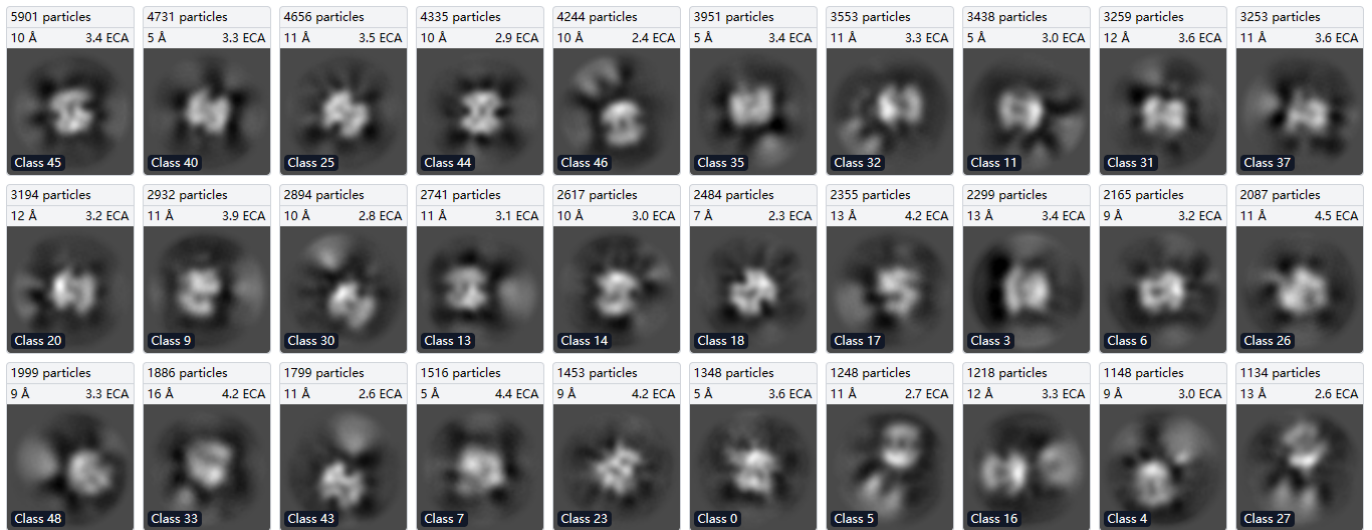

**Supplementary Figure 13 | Identification and analysis of the SA particles. (a)** A typical micrograph of the SA. The experiment was repeated at least three times independently with similar results. **(b)** Typical 2D classes of the SA particles. The SA particles were identified by 2D averaging function in CryoSPARC. **(c)** The number of SA particles per  $\mu\text{m}^2$  at a series of conditions. The error bars are standard deviation.
