# Supplementary material for: Open architecture of archaea MCM and dsDNA complexes resolved using monodispersed streptavidin affinity CryoEM
Source: PubMed Central journal article supplement (PMC11603195; doi:10.1038/s41467-024-53745-w), 2024-11-27
Supplement: 41467_2024_53745_MOESM2_ESM.pdf [file 41467_2024_53745_MOESM2_ESM.pdf]

## **Description of Additional Supplementary Files**

**File name: Supplementary Movie 1**

Description: A 360° perspective of the fitting of a dsDNA into the segmented density (orange).
